# Supplementary material for: Efficacy and Safety of Preoperative Melatonin for Women Undergoing Cesarean Section: A Systematic Review and Meta-Analysis of Randomized Placebo-Controlled Trials
Source: MDPI journal article supplement (doi:10.3390/medicina59061065), 2023-06-01

## **Table S1. The details of the search strategy for each database:**

### **PubMed**

Strategy: (Melatonin OR pineal hormone OR NSC-113928) AND (Cesarean section OR Caesarean Section OR Abdominal Deliveries OR Abdominal delivery OR C-Section OR C Section OR Postcesarean Section)

Results: 29

### **Scopus**

Strategy: (Melatonin OR "pineal hormone" OR "NSC-113928") AND ("Cesarean section" OR "Caesarean Section" OR "Abdominal Deliveries" OR "Abdominal delivery" OR "C-Section" OR "C Section" OR "Postcesarean Section")

Results: 67

### **Cochrane**

Strategy: : (Melatonin OR pineal hormone OR NSC-113928) AND (Cesarean section OR Caesarean Section OR Abdominal Deliveries OR Abdominal delivery OR C-Section OR C Section OR Postcesarean Section)

Results: 26

### **WOS**

Strategy: (Melatonin OR pineal hormone OR NSC-113928) AND (Cesarean section OR Caesarean Section OR Abdominal Deliveries OR Abdominal delivery OR C-Section OR C Section OR Postcesarean Section)

Results: 260

**Table S2.** Summary of GRADE rating.

| Outcome                         | Risk of bias         | Inconsistency        | Indirectness | Imprecision          | Other considerations <sup>a</sup> | Overall certainty of evidence |
|---------------------------------|----------------------|----------------------|--------------|----------------------|-----------------------------------|-------------------------------|
| Hemoglobin (mg/dl)              | Serious <sup>b</sup> | Serious <sup>c</sup> | Not serious  | Serious <sup>d</sup> | Not serious                       | ⊕○○○<br>Very low              |
| Heart rate (bpm)                | Serious <sup>b</sup> | Serious <sup>c</sup> | Not serious  | Serious <sup>d</sup> | Not serious                       | ⊕○○○<br>Very low              |
| Mean arterial pressure          | Serious <sup>b</sup> | Serious <sup>c</sup> | Not serious  | Serious <sup>d</sup> | Not serious                       | ⊕○○○<br>Very low              |
| Pain score (10-point)           | Serious <sup>b</sup> | Serious <sup>c</sup> | Not serious  | Serious <sup>d</sup> | Not serious                       | ⊕○○○<br>Very low              |
| Time to first analgesic request | Serious <sup>b</sup> | Serious <sup>c</sup> | Not serious  | Serious <sup>d</sup> | Not serious                       | ⊕○○○<br>Very low              |
| Total blood loss                | Serious <sup>b</sup> | Serious <sup>c</sup> | Not serious  | Serious <sup>d</sup> | Not serious                       | ⊕○○○<br>Very low              |
| Adverse events                  | Serious <sup>b</sup> | Serious <sup>c</sup> | Not serious  | Serious <sup>d</sup> | Not serious                       | ⊕○○○<br>Very low              |

<sup>a</sup> Other considerations are publication bias, large effect, dose response, and plausible confounding factors.

<sup>b</sup> As the included studies showed higher risk of bias especially with randomization process besides other bias.

<sup>c</sup> As the outcome had significant heterogeneity.

<sup>d</sup> As the analysis included small number of patients with wide confidence interval.

Very low quality— Any estimate of effect is very uncertain.

## 2 Figures:

**Figure S1: Forest plot comparing each dose of the melatonin and the placebo regarding hemoglobin level:**

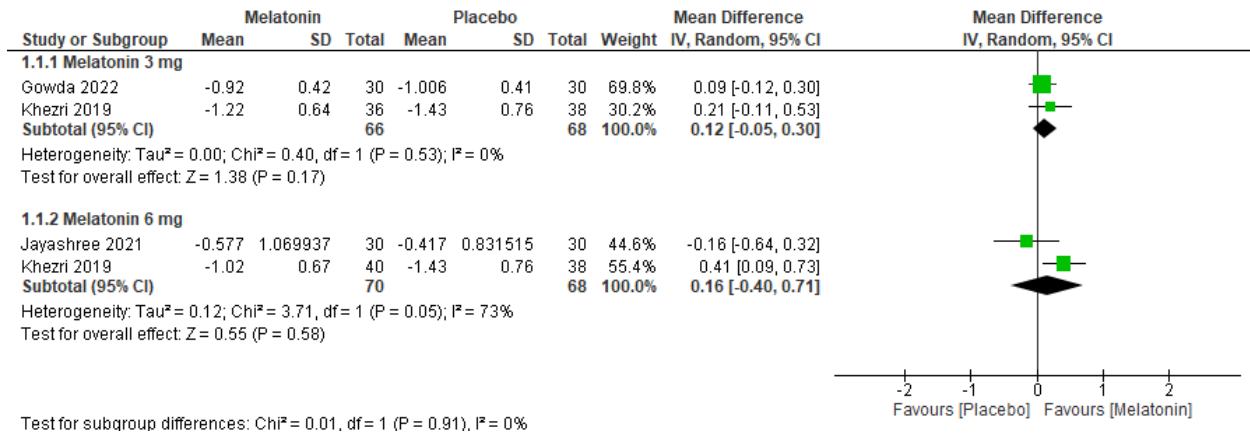

**Figure S2: Forest plot comparing each dose of the melatonin and the placebo regarding heart rate:**

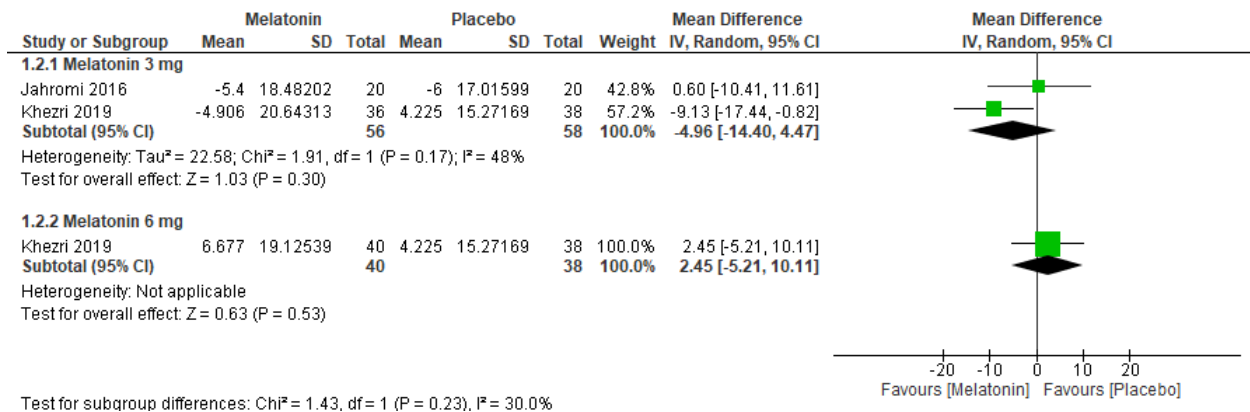

**Figure S3: Forest plot comparing each dose of the melatonin and the placebo regarding mean arterial pressure:**

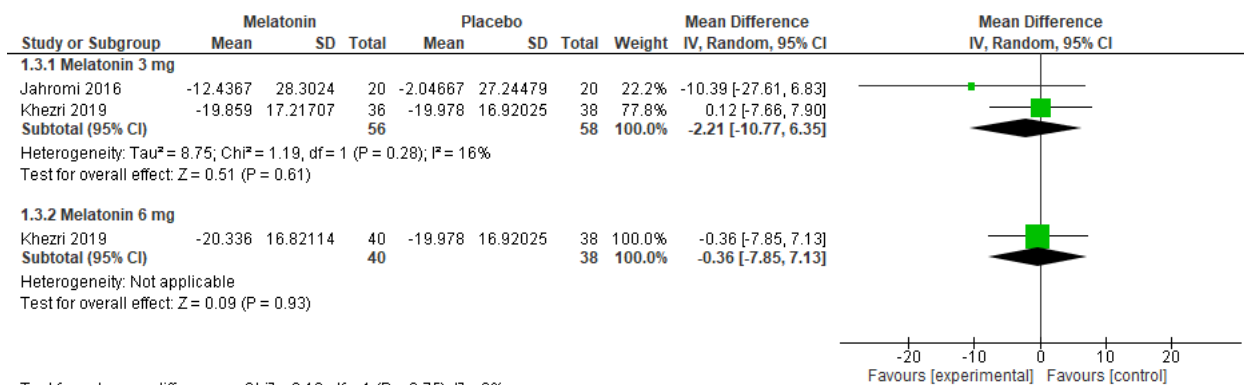

**Figure S4: Forest plot comparing each dose of the melatonin and the placebo regarding the pain score:**

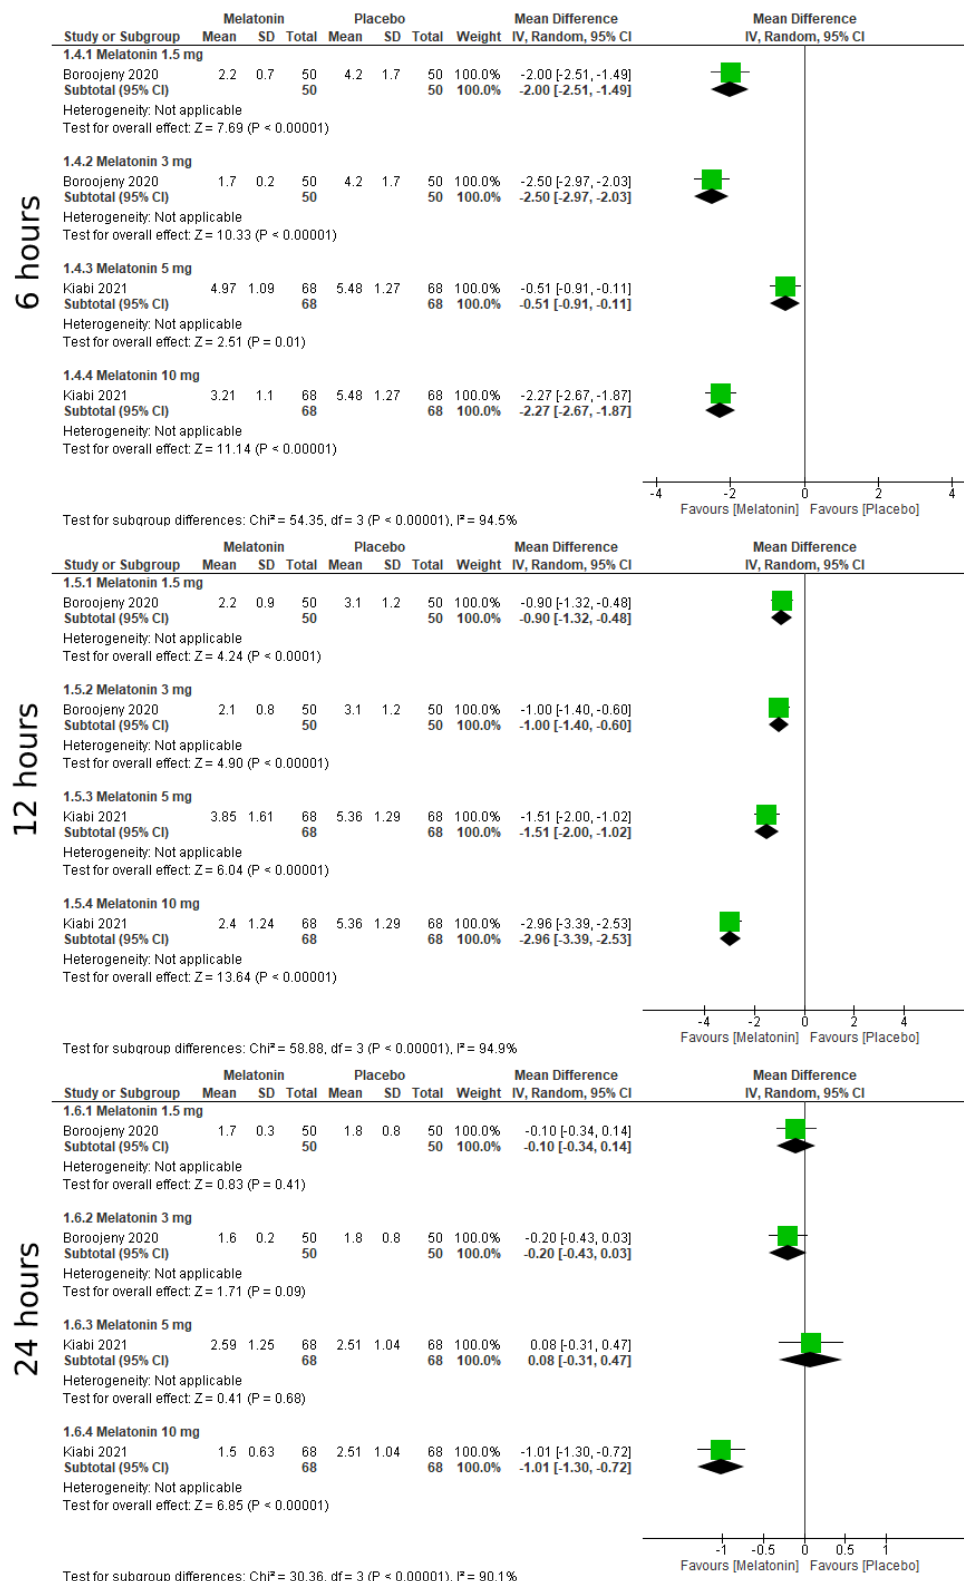

**Figure S5: Forest plot comparing each dose of the melatonin and the placebo regarding the time to first analgesic request:**

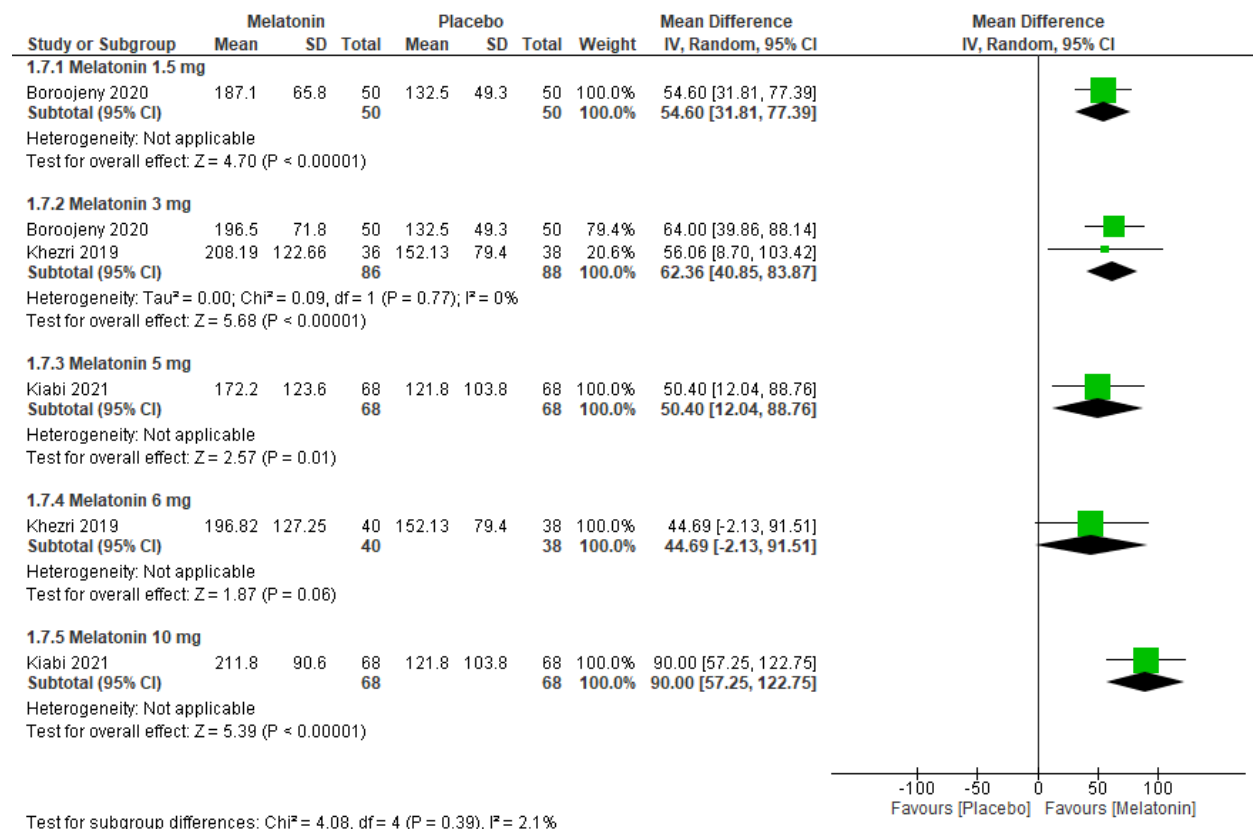

**Figure S6: Forest plot comparing each dose of the melatonin and the placebo regarding the total blood loss:**

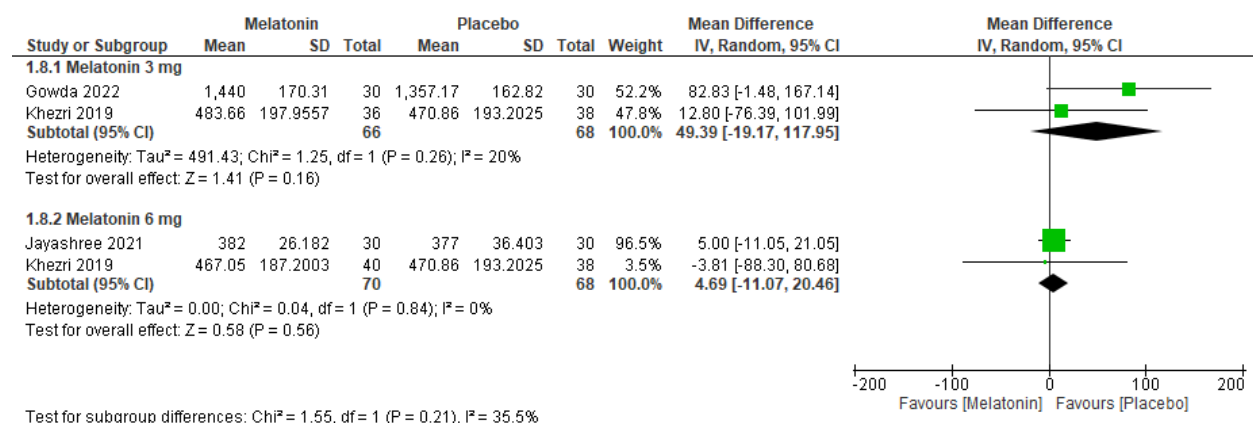

**Figure S7: Forest plot comparing each dose of the melatonin and the placebo regarding the adverse events:**

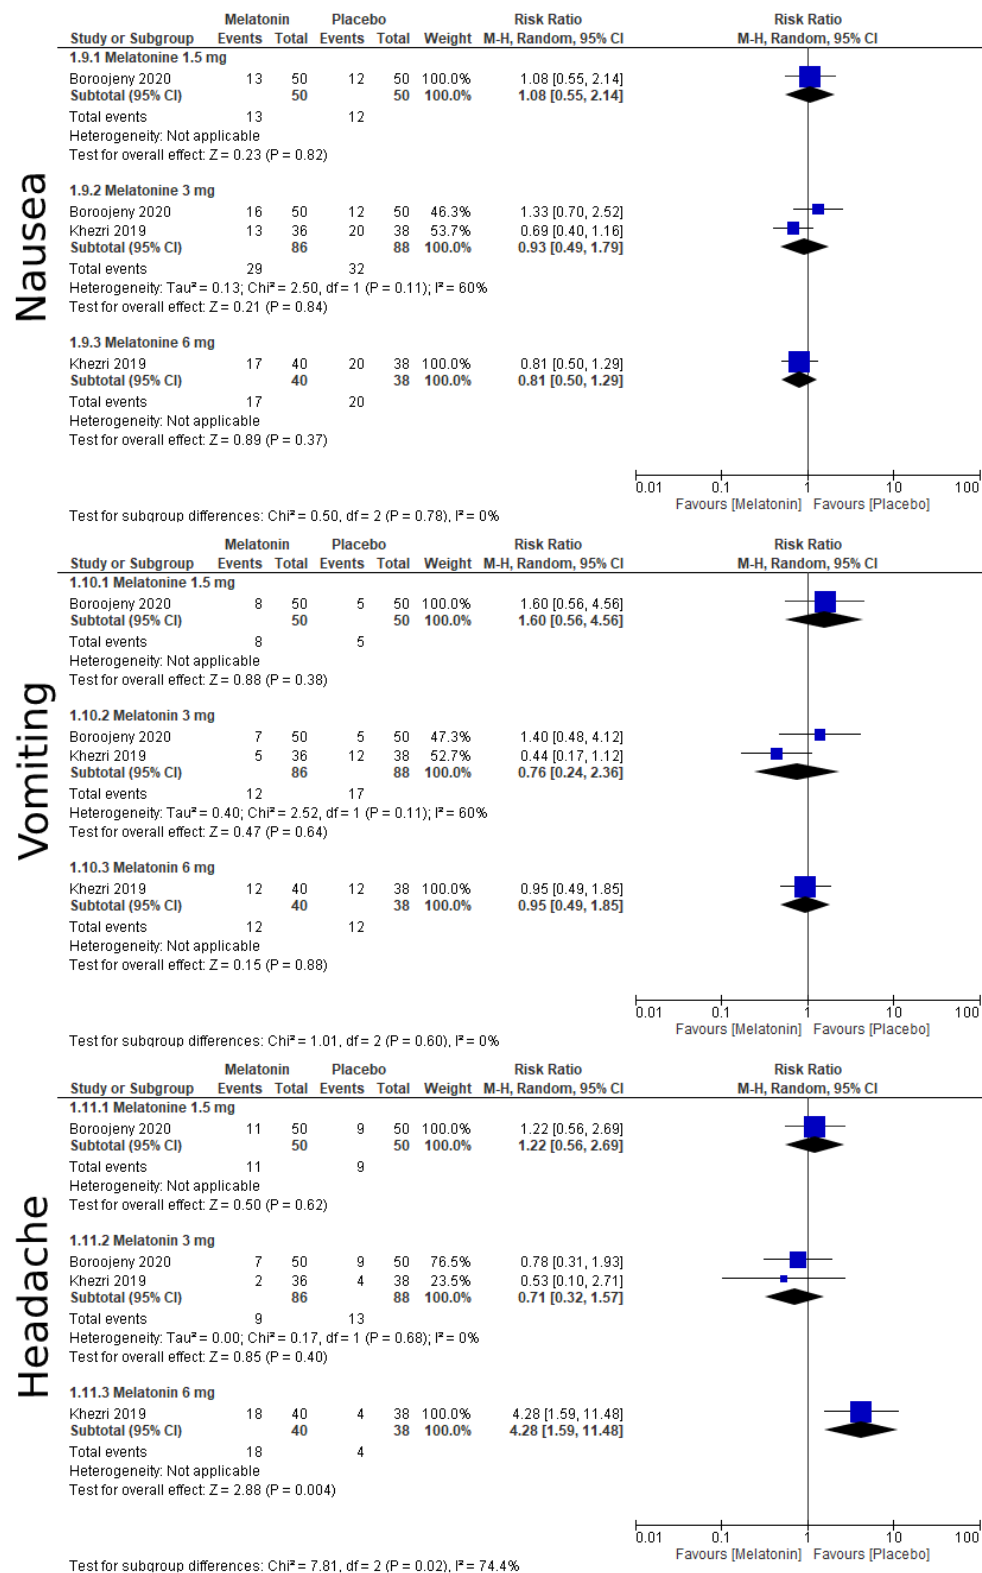

Supplement: s1 [file s1]
